# Supplementary material
Source: PubMed Central journal article supplement (PMC1698764)

## Legends of supplementary figures

Figure 1. Transgene expression in the primitive heart. (A,B) Whole-mount X-gal staining. At E8.5, L-WNK1-LacZ is strongly expressed in the linear heart tube. ht: heart tube, OFT: outflow tract, V: ventricle, A: atrium, SV: sinus venosus.

Figure 2. Comparison of transgene expression in the cerebellum between P7 and adult stage. (A,B) X-gal staining of cerebellum frozen sections counterstained with eosin. Mol: molecular layer, Pj purkinje cell layer, Gr: granular layer.

SUPPLEMENTARY DATA:

FIGURE 1

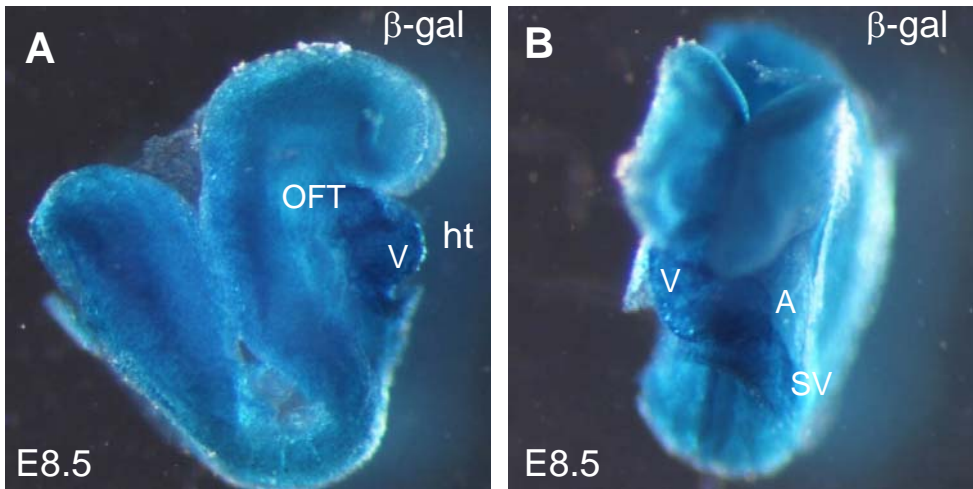

FIGURE 2

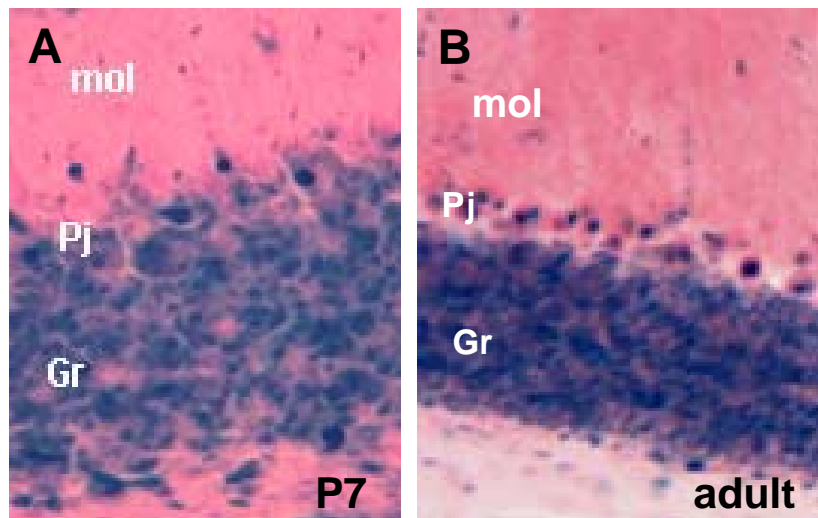

Supplement: amjpathol_169_1_105__1.pdf [file amjpathol_169_1_105__1.pdf]
